# Supplementary material
Source: MDPI journal article supplement (https://www.mdpi.com/2073-4352/13/4/700)
Supplement: s1 [file s1]

# Strain-Induced Band Gap Variation in InGaN/GaN Short Period Superlattices

Polyxeni Chatzopoulou <sup>1</sup>, Isaak G. Vasileiadis <sup>1</sup>, Philomela Komninou <sup>1</sup>, Vassilis Pontikis <sup>2</sup>,  
Theodoros Karakostas <sup>1</sup> and George P. Dimitrakopoulos <sup>1,\*</sup>

<sup>1</sup> School of Physics, Aristotle University of Thessaloniki, GR 54124 Thessaloniki, Greece

<sup>2</sup> DRF/IRAMIS, Centre d'Etudes de Saclay, Commissariat à l'Energie Atomique et aux Energies Alternatives, Université Paris-Saclay, 91191 Gif-sur-Yvette Cedex, France

\* Correspondence: gdim@auth.gr

## SUPPLEMENTARY MATERIAL

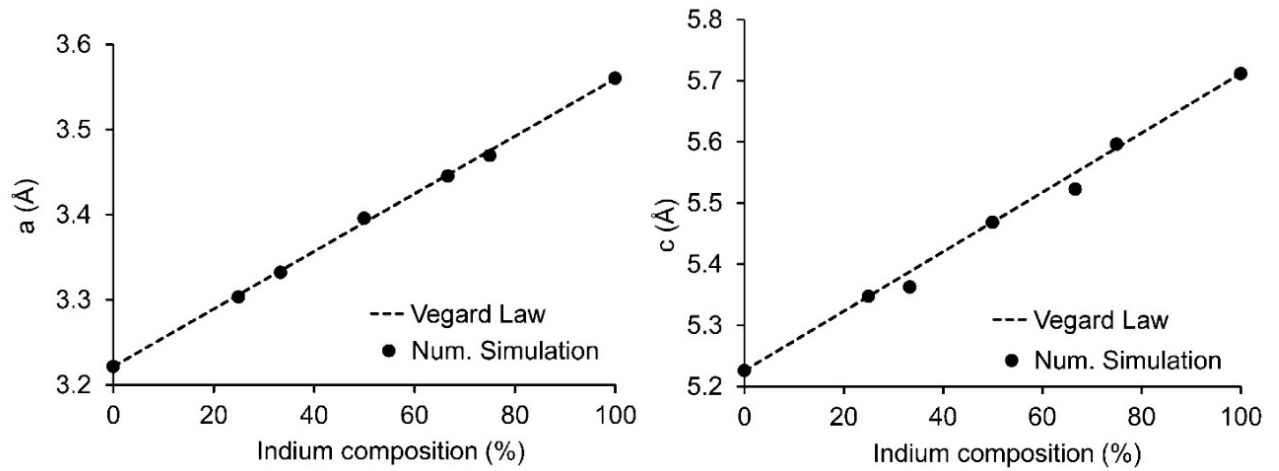

**Figure S1.** Calculated equilibrium lattice parameters of  $\text{In}_x\text{Ga}_{1-x}\text{N}$  bulk alloys, with respect to indium composition. A linear behavior is observed, in line with Vegard's law. There is a slight deviation in the  $c$ -parameter of  $\text{In}_{33}\text{Ga}_{67}\text{N}$  and  $\text{In}_{67}\text{Ga}_{33}\text{N}$  equal to  $\sim -0.03$  Å.

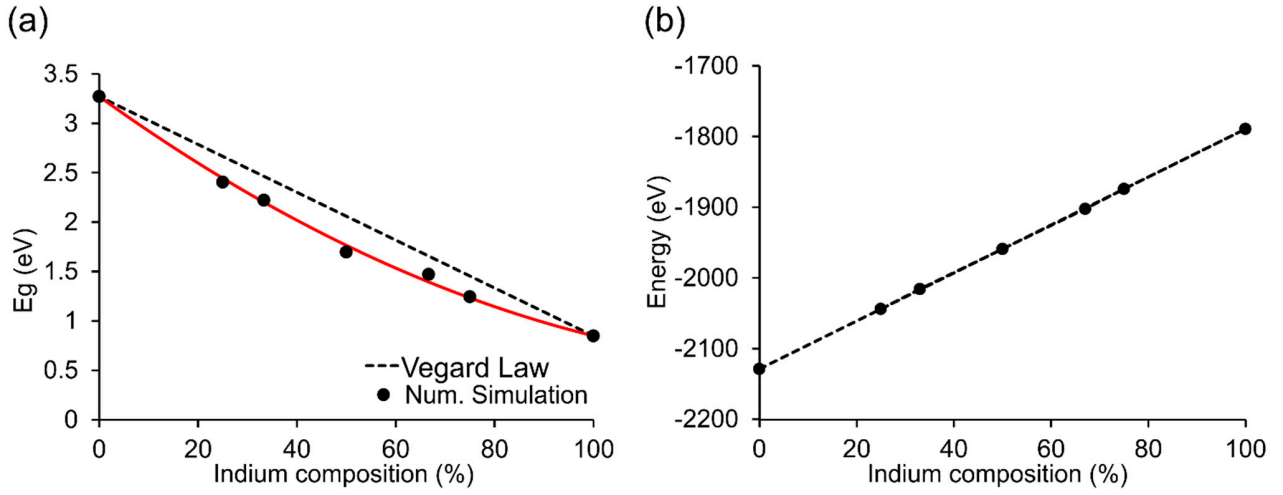

**Figure S2.** (a) Calculated band gap versus indium composition, of the  $\text{In}_x\text{Ga}_{1-x}\text{N}$  alloys showing bowing consistent with a bowing parameter of  $b = 1.18 \pm 0.09$  eV. (b) Total energy of the  $\text{In}_x\text{Ga}_{1-x}\text{N}$  supercells per atomic column with respect to alloy composition.

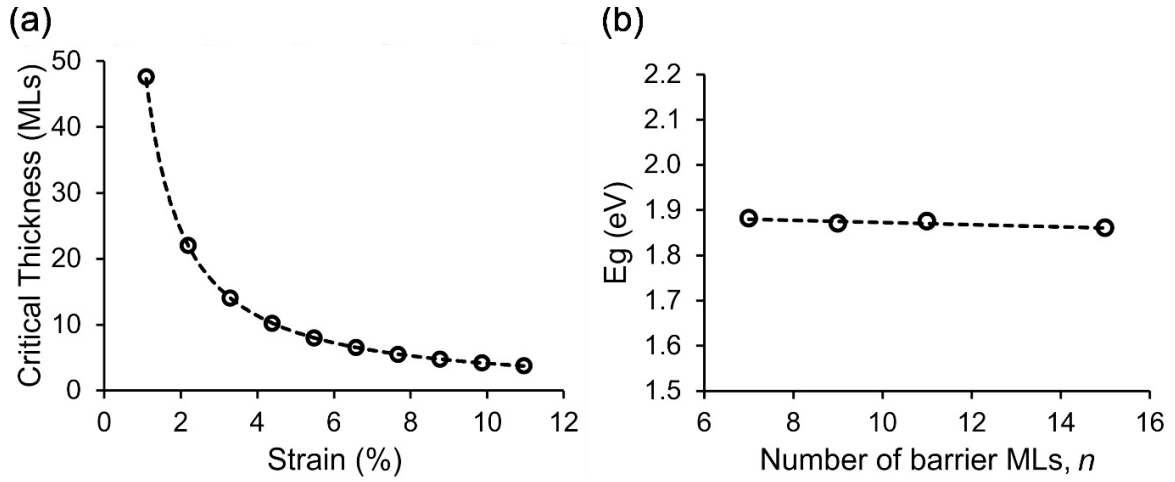

**Figure S3.** (a) Critical thickness of GaN with respect to the in-plane strain obtained using the model of Fischer et al. [1]. The formation of elastically strained GaN barriers with thickness at least 10 MLs is permitted for in-plane strain values up to  $\sim 4\%$ . (b) Band gap variation of  $1\text{InN}/n\text{GaN}$  short-period superlattices as a function of GaN barrier thickness  $n$  (unstrained barrier). The dependence of the band gap energy on the barrier thickness is negligible for GaN barriers thicker than 7 MLs.

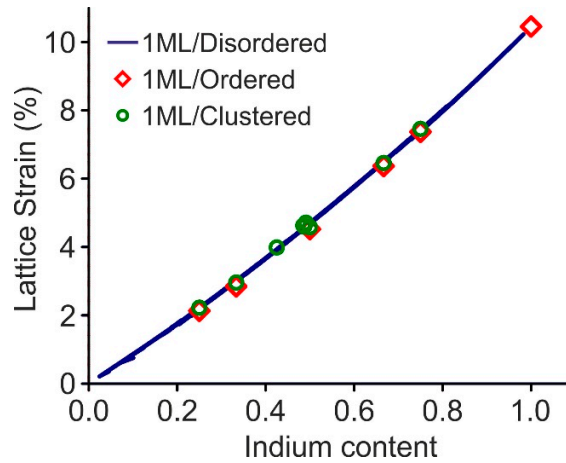

**Figure S4.** Calculated lattice strain with respect to the indium content for ordered, disordered and clustered  $\text{In}_x\text{Ga}_{1-x}\text{N}/\text{GaN}$  quantum wells of one monolayer thickness. The plotted lattice strain is the reduced relative variation of the  $c$ -lattice constant along [0001] having as reference the  $c$ -lattice constant of GaN. The disordered quantum wells were obtained from empirical potential calculations as described elsewhere [2]. The ordered and the clustered quantum wells were obtained by both empirical potential calculations and DFT calculations.

#### References

1. Fischer, A.; Kühne, H.; Richter, H. New Approach in Equilibrium Theory for Strained Layer Relaxation. *Phys. Rev. Lett.* **1994**, *73*, 2712–2715, <https://doi.org/10.1103/physrevlett.73.2712>.
2. Vasileiadis, I.G.; Lymperakis, L.; Adikimenakis, A.; Gkotinakos, A.; Devulapalli, V.; Liebscher, C.H.; Androulidaki, M.; Hübner, R.; Karakostas, T.; Georgakilas, A.; et al. Substitutional synthesis of sub-nanometer InGa<sub>x</sub>N/GaN quantum wells with high indium content. *Sci. Rep.* **2021**, *11*, 1–13, <https://doi.org/10.1038/s41598-021-99989-0>.
